# Supplementary material
Source: MDPI journal article supplement (https://www.mdpi.com/2673-4672/1/3/13)
Supplement: s1 [file s1]

# Supplementary Materials.

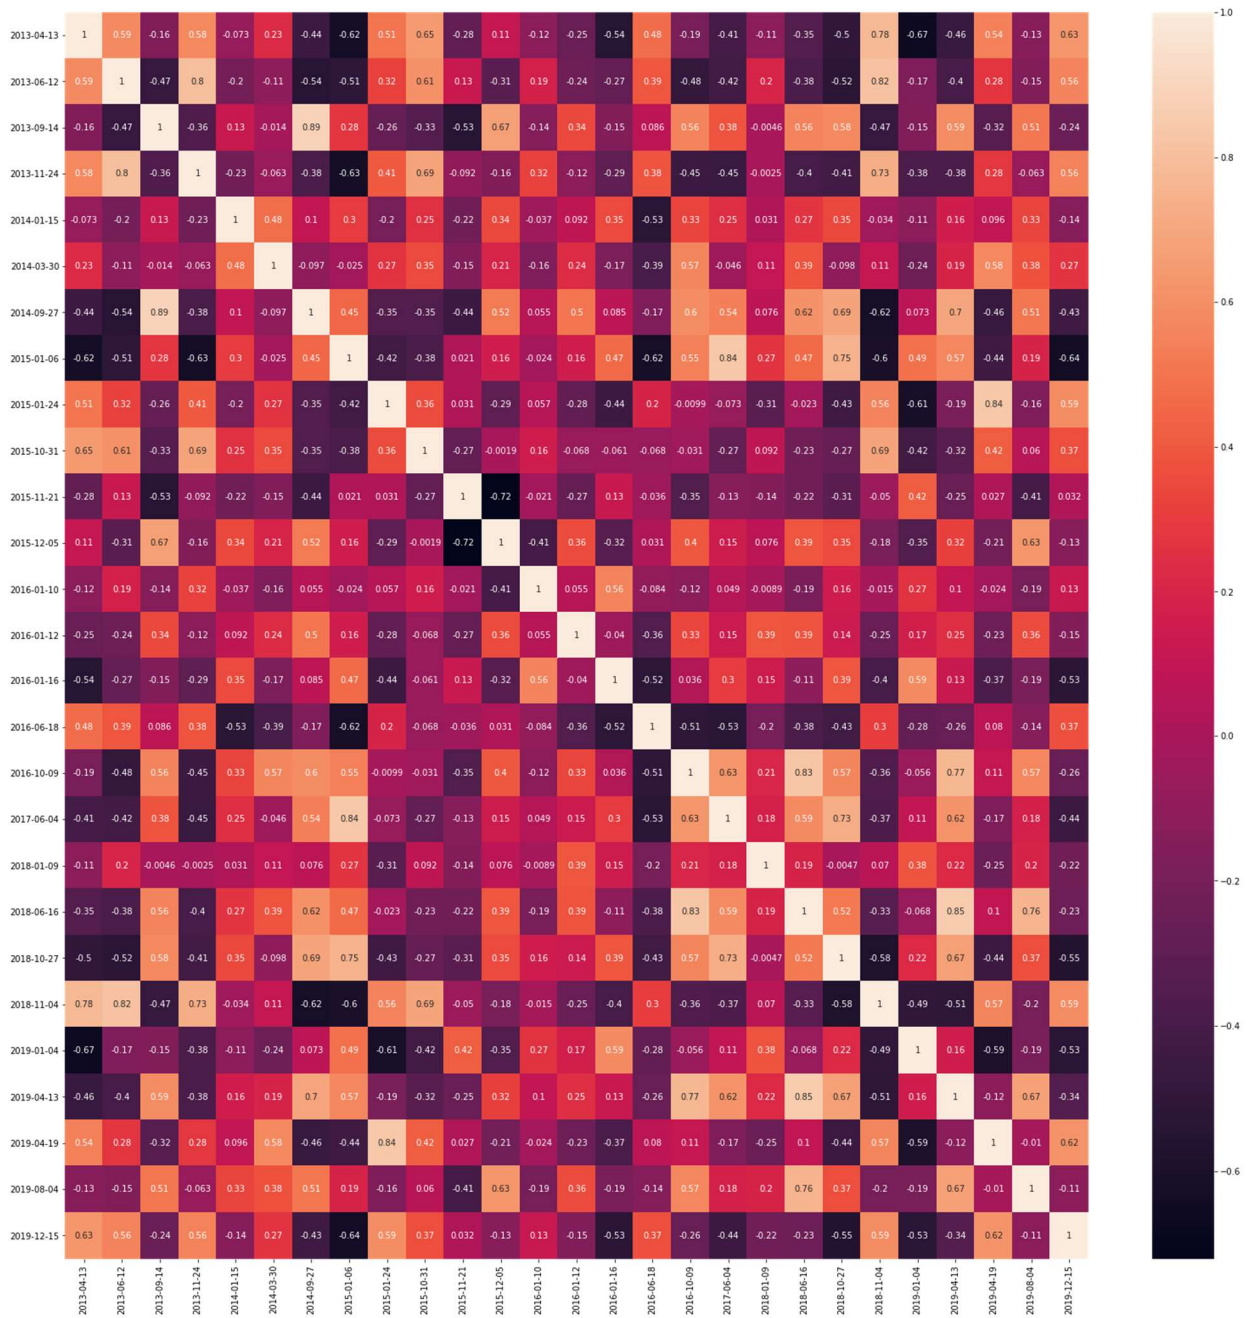

Figure S1. The correlation matrices for significant waves height over a period of 10 days.

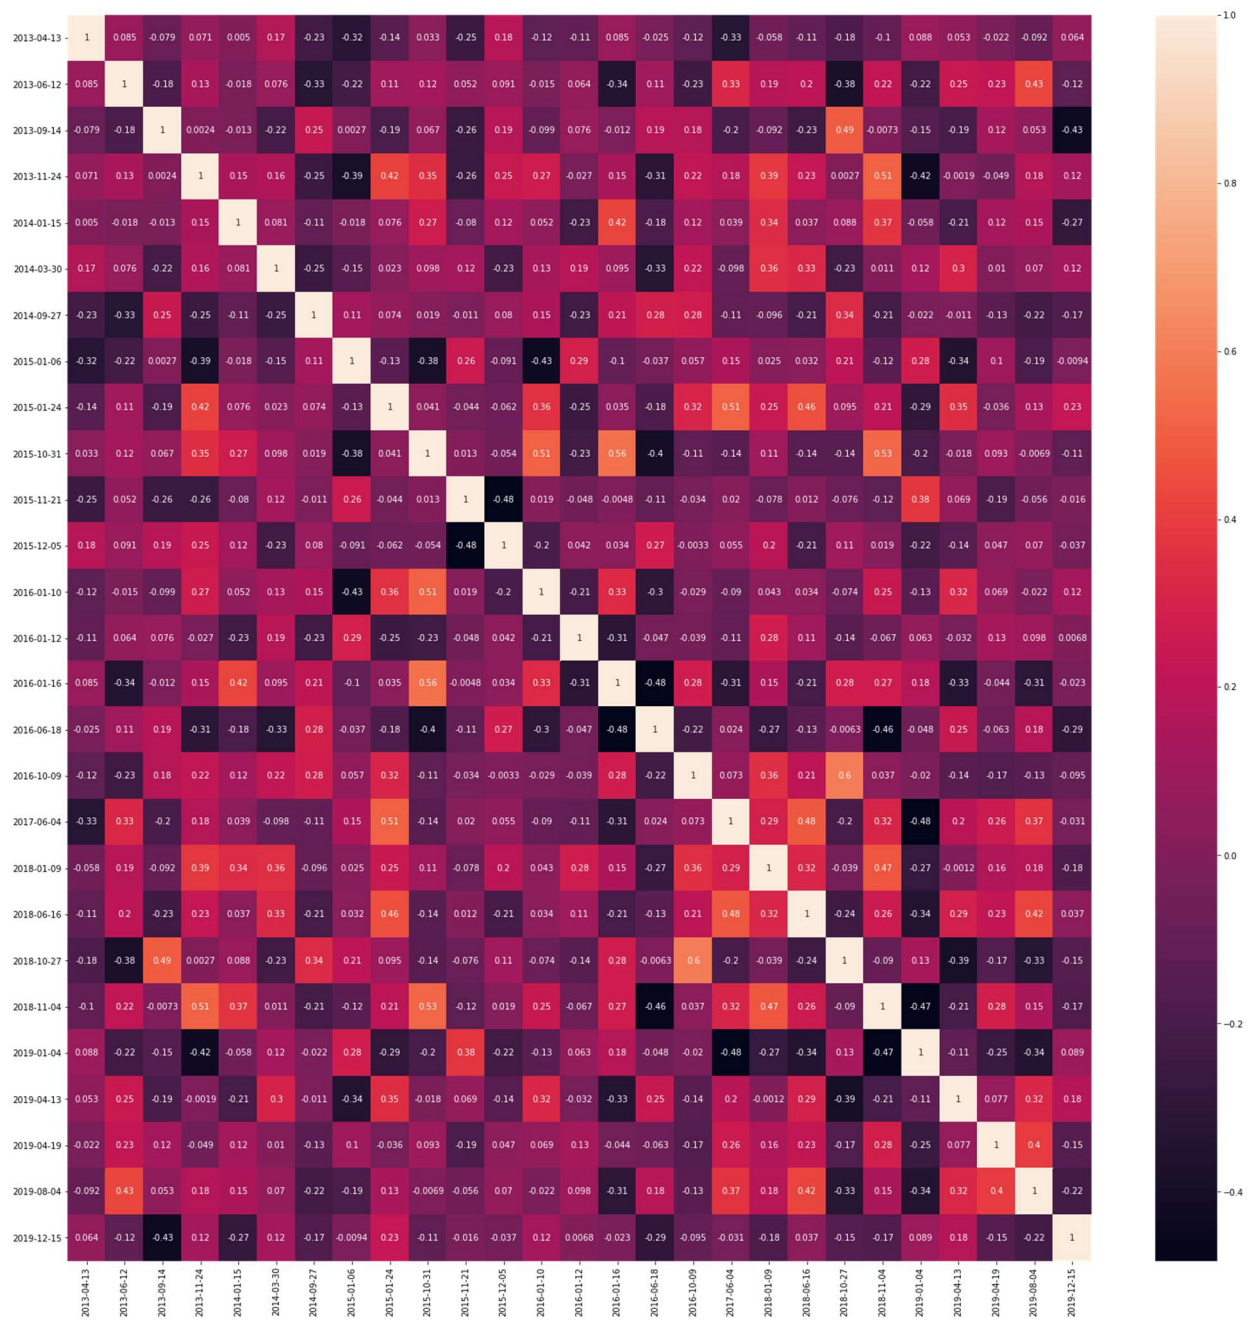

**Figure S2.** The correlation matrices for wind speed over a period of 10 days.
