# Supplementary material
Source: MDPI journal article supplement (https://www.mdpi.com/2673-4672/1/3/13)
Supplement: s1 [file s1]

Archive with 1 entries (1 files):
- pollutants-1261131-supplementary.pdf
